# Supplementary material
Source: Springer Nature journal article supplement (https://www.springermedizin.de/resource/supplementary/12882_2004_35_MOESM3_ESM.pdf/9454814)

## Effect of ACEI on Proteinuria

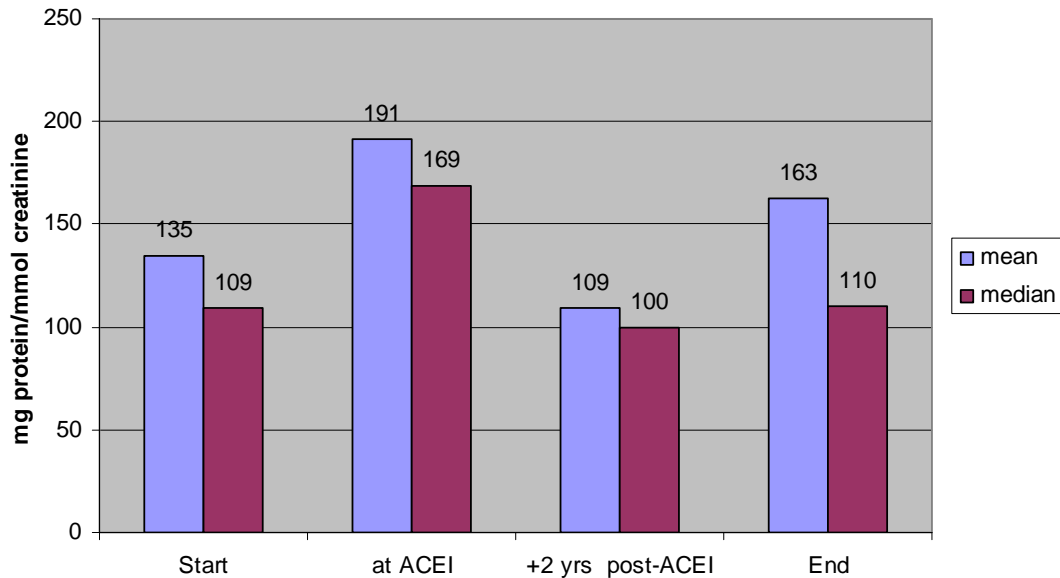

Supplement: MOESM3 [file 9454814]
